# Supplementary material for: Human Resources in Chinese Youngsters – A Chinese Adaptation of the QARCA
Source: Atypon-hosted journal article supplement (doi:10.1027/2698-1866/a000003), 2020-06-26
Supplement: 2698-1866_a000003_esm1.pdf [file 2698-1866_a000003_esm1.pdf]

### ESM 1: Example Items of the QARCA

---

| Scales | Example Items                                                |
|--------|--------------------------------------------------------------|
| EPT    | I try hard to understand others.                             |
| SEFF   | I can reach a lot with my ability.                           |
| SEST   | I am proud of myself.                                        |
| SOC    | I think my life makes sense.                                 |
| OPT    | Even if I have problems, I see the positive side.            |
| SCON   | I can concentrate well on my tasks.                          |
| PSUP   | My parents can comfort me well.                              |
| AUP    | My parents are warmhearted, but they also set limits for me. |
| IPG    | I think others of my age like me.                            |
| EDUI   | My classmates are nice to me.                                |

---

*Note:* The English translation has not been validated. EPT = empathy and perspective-taking. SEFF = self-efficacy. SEST = self-esteem. SOC = sense of coherence. OPT = optimism. SCON = self-control. PSUP = parental social and emotional support. AUP = authoritative parenting. IPG = integration into peer groups. EDUI = educational integration.
