# Supplementary material for: Human Resources in Chinese Youngsters – A Chinese Adaptation of the QARCA
Source: Atypon-hosted journal article supplement (doi:10.1027/2698-1866/a000003), 2020-06-26
Supplement: 2698-1866_a000003_esm3.pdf [file 2698-1866_a000003_esm3.pdf]

**ESM 3: Results of the Validation Study**

ESM 3.1 *Description of Subsamples and the Corresponding Sets of Questionnaires*

| Subsample | QARCA-C combined with |           |     |        |      | <i>n</i> |
|-----------|-----------------------|-----------|-----|--------|------|----------|
|           | SDQ                   | KIDSCREEN | ERQ | s-EMBU | SSKJ |          |
| 1         | X                     |           | X   |        | X    | 577      |
| 2         | X                     | X         |     |        |      | 742      |
| 3         |                       |           |     | X      |      | 497*     |
| 4         |                       | X         |     |        | X    | 188      |
| 5         |                       |           | X   |        |      | 539      |
| 6         | X                     |           |     |        |      | 173      |

*Note.* *n* = size of the subsample. QARCA-C = Questionnaire to Assess Resources for Children and Adolescents - Chinese. SDQ = Strength and Difficulties Questionnaire. KIDSCREEN = Quality of Life Questionnaire for Children and Adolescents. s-EMBU = Egna Minnen Barndoms Uppfostran. ERQ = Emotion Regulation Questionnaire. SSKJ = German Stress and Coping Questionnaire for Children and Adolescents. \*: 393 parents filled in parent reports.

ESM 3.2 *Gender-Specific Mean Comparisons Using t-Tests*

|             | <i>Boys</i><br>( <i>n</i> = 1,350) |           | <i>Girls</i><br>( <i>n</i> = 1,250) |           | <i>t</i> -test | <i>Cohen's d</i> |
|-------------|------------------------------------|-----------|-------------------------------------|-----------|----------------|------------------|
|             | <i>M</i>                           | <i>SD</i> | <i>M</i>                            | <i>SD</i> |                |                  |
| EPT         | 2.98                               | 0.60      | 3.02                                | 0.59      | -1.67          | 0.07             |
| SEFF        | 2.80                               | 0.53      | 2.78                                | 0.54      | 0.92           | -0.04            |
| SEST        | 2.62                               | 0.66      | 2.60                                | 0.68      | 0.75           | -0.03            |
| SOC         | 3.01                               | 0.55      | 2.99                                | 0.56      | 0.92           | -0.04            |
| OPT         | 3.10                               | 0.57      | 3.04                                | 0.62      | 2.59**         | -0.10            |
| SCON        | 2.92                               | 0.56      | 2.93                                | 0.56      | -0.29          | 0.01             |
| PSUP        | 2.97                               | 0.68      | 2.95                                | 0.73      | 0.80           | -0.03            |
| AUP         | 2.93                               | 0.68      | 2.86                                | 0.72      | 2.67**         | -0.11            |
| IPG         | 3.21                               | 0.64      | 3.20                                | 0.66      | 0.54           | -0.02            |
| EDUI        | 3.25                               | 0.66      | 3.23                                | 0.70      | 0.58           | -0.02            |
| Total Score | 2.99                               | 0.45      | 2.97                                | 0.47      | 1.11           | -0.04            |

*Note.* *M* = mean. *SD* = standard deviation. \*  $p < .05$ . \*\*  $p < .01$ . \*\*\*  $p < .001$ . EPT = empathy and perspective-taking. SEFF = self-efficacy. SEST = self-esteem. SOC = sense of coherence. OPT = optimism. SCON = self-control. PSUP = parental social and emotional support. AUP = authoritative parenting. IPG = integration into peer groups. EDUI = educational integration.

ESM 3.3 *The 15 residual correlations that were allowed*

EPT: Item 6 with Item 32

- Item 6: I try hard to understand others.
- Item 32: I know how other people feel.

SEFF: Item 3 with Item 5, Item 15 with Item 21

- Item 3: I can reach what I really want to achieve.
- Item 5: When I set a goal, I also achieve it.
- Item 15: I can reach a lot with my ability.
- Item 21: With my abilities, I can achieve everything.

SEST: Item 25 with Item 29, Item 31 with Item 34

- Item 25: I like myself.
- Item 29: I can be proud of myself.
- Item 31: I feel comfortable thinking about myself.
- Item 34: I have many good feelings when I think about myself.

SOC: Item 13 with Item 24

- Item 13: I can influence my life.
- Item 24: I can control what happens in my life.

OPT: Item 4 with Item 8, Item 11 with Item 26

- Item 4: Even though I have problems, I see the positive side.
- Item 8: If I don't feel so good, I know that I will feel better soon.
- Item 11: I believe that somehow everything will turn out for the best.
- Item 26: I look to my future with confidence.

AUP: Item 42 with Item 47, Item 45 with Item

- Item 42: There are rules at home that I have to follow.
- Item 47: My parents explain the rules that apply in our home.
- Item 45: We have rules here, but I have a say in it.

IPG: Item 52 with Item 53, Item 53 with Item 54

- Item 52: My friends like me for who I am
- Item 53: I think others of my age like me.
- Item 54: I have a lot of contact with people of my age.

EDUI: Item 55 with Item 60, Item 56 with Item 59, and Item 57 with Item 60

- Item 55: I feel comfortable at school.
- Item 60: I feel comfortable in my class.
- Item 56: I come along well with my classmates.
- Item 59: My classmates are nice to me.
- Item 57: The climate in my school is really good.

Authors' Note: We ad hoc translated these items from German into English. There is no validated English version.

ESM 3.4 *Goodness-of-Fit of the Unidimensional Confirmatory Factor Analyses for the Subscales without Residual Correlations (WLSMV-estimates)*

|       | $\chi^2$  | <i>df</i> | <i>p</i> | <i>RMSEA</i> | 90% C.I. |       | <i>CFI</i> |
|-------|-----------|-----------|----------|--------------|----------|-------|------------|
|       |           |           |          |              | lower    | upper |            |
| EPT   | 375.39    | 9         | <.001    | .13          | .11      | .14   | .97        |
| SEFF  | 456.54    | 9         | <.001    | .14          | .13      | .15   | .92        |
| SEST  | 461.10    | 5         | <.001    | .19          | .17      | .20   | .96        |
| SOC   | 277.99    | 9         | <.001    | .11          | .10      | .12   | .94        |
| OPT   | 198.23    | 9         | <.001    | .09          | .08      | .10   | .98        |
| AUP   | 769.91    | 9         | <.001    | .18          | .17      | .19   | .93        |
| IPG   | 609.07    | 9         | <.001    | .16          | .15      | .17   | .96        |
| EDUI  | 803.04    | 9         | <.001    | .18          | .17      | .20   | .97        |
| total | 10850.261 | 1607      | <.001    | .047         | .046     | .048  | .912       |

*Note:* *N* = 2,600. EPT = empathy and perspective-taking. SEFF = self-efficacy. SEST = self-esteem. SOC = sense of coherence. OPT = optimism. SCON = self-control. PSUP = parental social and emotional support. AUP = authoritative parenting. IPG = integration into peer groups. EDUI = educational integration.

ESM 3. 5 Estimating Measurement Invariance across Gender Using Multi-Group CFAs in Mplus (WLSMV-Estimates)

|      | Model | $\chi^2$  | df | RMSEA | 90% C.I. |       | CFI  | $\Delta\chi^2$  |
|------|-------|-----------|----|-------|----------|-------|------|-----------------|
|      |       |           |    |       | lower    | upper |      |                 |
| EPT  | 1     | 78.18***  | 16 | .06   | .04      | .07   | .99  | –               |
|      | 2     | 73.69***  | 21 | .04   | .03      | .06   | .99  | 2-1 = 10.27     |
|      | 3     | 117.39*** | 38 | .04   | .03      | .05   | .99  | 3-2 = 47.08***  |
|      | 4     | 90.05***  | 32 | .04   | .03      | .05   | .99  | 4-2 = 19.20 (6) |
| SEFF | 1     | 28.20*    | 14 | .03   | .01      | .04   | .99  | –               |
|      | 2     | 30.71*    | 19 | .02   | .00      | .04   | .99  | 2-1 = 5.42      |
|      | 3     | 102.65*** | 36 | .04   | .03      | .05   | .99  | 3-2 = 69.33***  |
|      | 4     | 34.11*    | 21 | .02   | .01      | .04   | .99  | 4-2 = 3.44      |
| SEST | 1     | 8.53      | 6  | .02   | .00      | .04   | 1.00 | –               |
|      | 2     | 9.78      | 10 | .00   | .00      | .03   | 1.00 | 2-1 = 2.77      |
|      | 3     | 69.00***  | 24 | .04   | .03      | .05   | .99  | 3-2 = 56.41***  |
|      | 4     | 20.57***  | 15 | .02   | .00      | .03   | .99  | 4-2 = 10.75     |
| SOC  | 1     | 90.41***  | 16 | .06   | .05      | .07   | .99  | –               |
|      | 2     | 80.09***  | 21 | .05   | .04      | .06   | .99  | 2-1 = 9.55      |
|      | 3     | 121.82*** | 38 | .04   | .03      | .05   | .98  | 3-2 = 44.05***  |
|      | 4     | 94.50***  | 32 | .04   | .03      | .05   | .99  | 4-2 = 16.75     |
| OPT  | 1     | 77.98***  | 14 | .07   | .06      | .08   | .99  | –               |
|      | 2     | 79.12***  | 19 | .05   | .04      | .06   | .99  | 2-1 = 4.3       |
|      | 3     | 150.27*** | 36 | .05   | .04      | .06   | .99  | 3-2 = 73.33***  |
| SCON | 1     | 103.60*** | 18 | .06   | .05      | .07   | .98  | –               |
|      | 2     | 89.49***  | 23 | .05   | .04      | .06   | .98  | 2-1 = 4.92      |
|      | 3     | 110.30*** | 40 | .04   | .03      | .05   | .98  | 3-2 = 24.86     |
| PSUP | 1     | 187.20*** | 18 | .08   | .07      | .10   | .99  | –               |
|      | 2     | 137.64*** | 23 | .06   | .05      | .07   | .99  | 2-1 = 7.16      |
|      | 3     | 211.74*** | 40 | .06   | .05      | .07   | .99  | 3-2 = 80.40***  |
| AUP  | 1     | 127.03*** | 14 | .08   | .07      | .09   | .99  | –               |
|      | 2     | 93.96***  | 19 | .06   | .04      | .07   | .99  | 2-1 = 3.59      |
|      | 3     | 173.02*** | 36 | .08   | .07      | .08   | .98  | 3-2 = 82.80***  |
|      | 4     | 99.45***  | 21 | .05   | .04      | .06   | .99  | 4-2 = 5.26      |
| IPG  | 1     | 150.77*** | 14 | .07   | .06      | .08   | .99  | –               |
|      | 2     | 85.89***  | 19 | .05   | .04      | .06   | .99  | 2-1 = 9.2       |
|      | 3     | 167.40*** | 36 | .05   | .05      | .06   | .99  | 3-2 = 84.15***  |
|      | 4     | 89.88***  | 21 | .05   | .04      | .06   | .99  | 4-2 = 4.19      |
| EDUI | 1     | 90.56***  | 12 | .07   | .06      | .09   | .99  | –               |
|      | 2     | 66.54***  | 17 | .05   | .04      | .06   | .99  | 2-1 = 9.67      |
|      | 3     | 110.18*** | 34 | .04   | .03      | .05   | .99  | 3-2 = 48.22***  |
|      | 4     | 73.88***  | 22 | .04   | .03      | .05   | .99  | 4-2 = 8.68      |

Note:  $N = 2600$ . \*  $p < .05$ . \*\*\*  $p < .001$ . Model 1 = configural invariance; 2 = full metric invariance: factor loadings were set the same across gender. Model 3 = full scalar invariance: factor loadings and thresholds of the manifest variables were set the same across gender. Model 4 = partial scalar invariance by setting free one to several thresholds.

ESM 3.6 *Equivalence Testing between the Chinese Scale and the Original German Scale with Mplus using Multi-Group CFAs (WLSMV-Estimates)*

|       | Model | $\chi^2$ | df   | p     | RMSEA | 90% C.I. |       | CFI               |
|-------|-------|----------|------|-------|-------|----------|-------|-------------------|
|       |       |          |      |       |       | lower    | upper |                   |
| EPT   | 1     | 499.81   | 13   | <.001 | .12   | .11      | .13   | .96               |
|       | 2     | 887.84   | 31   | <.001 | .10   | .10      | .11   | .93               |
|       | 3     | 101.05   | 11   | <.001 | .06   | .05      | .07   | .99 <sup>2</sup>  |
| SEFF  | 1     | 209.85   | 12   | <.001 | .08   | .07      | .09   | .96               |
|       | 2     | 2513.21  | 30   | <.001 | .18   | .17      | .18   | .53               |
|       | 4     | 252.81   | 14   | <.001 | .08   | .07      | .09   | .96 <sup>16</sup> |
| SEST  | 1     | 67.17    | 7    | <.001 | .06   | .05      | .07   | .99               |
|       | 2     | 5480.11  | 22   | <.001 | .31   | .30      | .32   | .49               |
|       | 4     | 170.41   | 11   | <.001 | .08   | .07      | .09   | .99 <sup>11</sup> |
| SOC   | 1     | 322.75   | 13   | <.001 | .09   | .09      | .11   | .94               |
|       | 2     | 1288.14  | 31   | <.001 | .13   | .12      | .13   | .74               |
|       | 3     | 135.96   | 11   | <.001 | .07   | .06      | .08   | .97 <sup>2</sup>  |
| OPT   | 1     | 184.38   | 12   | <.001 | .07   | .07      | .08   | .98               |
|       | 2     | 2126.65  | 30   | <.001 | .16   | .16      | .17   | .72               |
|       | 4     | 366.36   | 19   | <.001 | .08   | .08      | .09   | .95 <sup>11</sup> |
| SCON  | 1     | 332.56   | 14   | <.001 | .09   | .09      | .10   | .92               |
|       | 2     | 959.95   | 32   | <.001 | .11   | .10      | .11   | .78               |
|       | 3     | 245.29   | 13   | <.001 | .08   | .07      | .09   | .94 <sup>1</sup>  |
| PSUP  | 1     | 815.16   | 14   | <.001 | .15   | .14      | .16   | .96               |
|       | 2     | 9246.73  | 32   | <.001 | .33   | .33      | .34   | .54               |
|       | 3     | 159.50   | 9    | <.001 | .08   | .07      | .09   | .99               |
| AUP   | 1     | 189.08   | 12   | <.001 | .08   | .07      | .09   | .98               |
|       | 2     | 6354.36  | 30   | <.001 | .29   | .28      | .29   | .39               |
|       | 4     | 238.82   | 15   | <.001 | .08   | .07      | .08   | .98 <sup>15</sup> |
| IPG   | 1     | 468.94   | 12   | <.001 | .12   | .11      | .13   | .97               |
|       | 2     | 2463.80  | 30   | <.001 | .18   | .17      | .18   | .83               |
|       | 3     | 145.47   | 9    | <.001 | .08   | .07      | .09   | .99 <sup>3</sup>  |
| EDUI  | 1     | 758.74   | 11   | <.001 | .16   | .15      | .17   | .98               |
|       | 2     | 1816.74  | 29   | <.001 | .15   | .15      | .16   | .94               |
|       | 3     | 114.82   | 7    | <.001 | .08   | .07      | .09   | 1.00 <sup>4</sup> |
| total |       | 10815.43 | 1640 | <.001 | .05   | .05      | .05   | .91               |

Note: N = 2600. Model 1 = full metric invariance: the factor loadings in the Chinese study were set the same as in the original study. Model 2 = scalar invariance: factor loadings and thresholds of the manifest variables in the Chinese study were set the same as in the original study. Model 3 = partial metric invariance by setting free one to four loadings (superscripts = numbers of the freed loadings). Model 4 = partial scalar invariance by setting free 11 or more thresholds of the manifest variables (superscripts = numbers of freed thresholds; note: each manifest variable has three thresholds).

ESM 3.7 Correlations between Resources and External Criteria: Emotion Regulation, Stress and Coping, Parenting, Well-Being, and Parent Report

| QARCA-C          | Emotion regulation |        |         |        | Stress and coping |        |        |         |         |         | Rejection |         | Emotional warmth |        | Overprotection |        | Well-being | QARC A-P |
|------------------|--------------------|--------|---------|--------|-------------------|--------|--------|---------|---------|---------|-----------|---------|------------------|--------|----------------|--------|------------|----------|
|                  | CR                 | ES     | VUL     | SOC    | PRO               | AVO    | PAL    | ANG     | PHY     | PSY     | Father    | Mother  | Father           | Mother | Father         | Mother |            |          |
| EPT              | .38***             | .16*** | -.04    | .22*** | .46***            | .03    | .19*** | -.21*** | .05     | -.05    | -.02      | -.01    | .22***           | .22*** | .07            | .01    | .28***     | .01      |
| SEFF             | .38***             | .12*** | -.14*** | .23*** | .37***            | .14*** | .31*** | -.09*   | -.03    | -.11**  | .00       | -.11*   | .25***           | .27*** | .03            | -.08   | .44***     | .04      |
| SEST             | .34***             | .06    | -.18*** | .27*** | .23***            | .15*** | .32*** | -.03    | -.16*** | -.22*** | .01       | -.01    | .20***           | .20*** | .02            | .01    | .49***     | -.03     |
| SOC              | .36***             | .15*** | -.14*** | .16*** | .38***            | .07*   | .27*** | -.13*** | -.03    | -.14*** | -.04      | -.12**  | .29***           | .26*** | -.01           | -.10*  | .47***     | .03      |
| OPT              | .47***             | .12*** | -.18*** | .24*** | .49***            | .13*** | .34*** | -.22*** | -.12**  | -.24*** | -.08      | -.16*** | .38***           | .42*** | .02            | -.07   | .61***     | -.02     |
| SCON             | .40***             | .21*** | -.09**  | .19*** | .41***            | .15*** | .32*** | -.12*** | .00     | -.09*   | -.06      | -.11*   | .25***           | .28*** | .00            | -.02   | .43***     | .03      |
| PSUP             | .29***             | .01    | -.08*   | .31*** | .29***            | -.09*  | .17*** | -.11**  | -.24*** | -.26*** | -.29***   | -.39*** | .62***           | .67*** | -.04           | -.15** | .58***     | -.04     |
| AUP              | .37***             | .10*** | -.08*   | .23*** | .30***            | .04    | .22*** | -.09*   | -.21*** | -.23*** | -.23***   | -.26*** | .59***           | .55*** | -.03           | -.04   | .55***     | .04      |
| IPG              | .28***             | .04    | -.07    | .25*** | .36***            | .05    | .22*** | -.11*** | -.12*** | -.16*** | -.03      | -.07    | .29***           | .30*** | .10*           | .02    | .52***     | .06      |
| EDUI             | .37***             | .04    | -.10**  | .20*** | .42**             | .00    | .19*** | -.22*** | -.25*** | -.27*** | -.12**    | -.13**  | .33***           | .36*** | .01            | -.02   | .67***     | .02      |
| total            | .51***             | .14*** | -.15*** | .33**  | .52***            | .08*   | .35*** | -.19*** | -.17*** | -.25*** | -.14**    | -.21**  | .51***           | .53*** | -.03           | -.07   | .72***     | .02      |
| McDonald's Omega | .82                | .71    | .70     | .88    | .91               | .78    | .84    | .88     | .79     | .91     | .79       | .80     | .86              | .82    | .65            | .65    | .86        | .69-.88  |

Note: \*  $p < .05$ . \*\*  $p < .01$ . \*\*\*  $p < .001$ . EPT = empathy and perspective-taking. SEFF = self-efficacy. SEST = self-esteem. SOC = sense of coherence. OPT = optimism. SCON = self-control. PSUP = parental social and emotional support. AUP = authoritative parenting. IPG = integration into peer groups. EDUI = educational integration. CR = cognitive reappraisal. ES = expressive suppression. VUL = vulnerability. SOC = seeking social support. PRO = problem solving. AVO = avoidant coping. PAL = palliative emotion regulation. ANG = anger-related emotion regulation. PHY = physical symptoms. PSY = psychological symptoms. QARCA-P = QARCA parent report.

ESM 3.8 *Correlations Between Resources and Strengths and Difficulties*

| QARCA-C          | SDQ                |                  |               |                            |                    |                          |
|------------------|--------------------|------------------|---------------|----------------------------|--------------------|--------------------------|
|                  | Emotional problems | Conduct problems | hyperactivity | Peer relationship problems | Prosocial behavior | Total difficulties score |
| EPT              | -.02               | .00              | -.18***       | -.17***                    | .44***             | -.02                     |
| SEFF             | -.09               | .03              | -.25***       | -.17***                    | .40***             | -.09**                   |
| SEST             | -.16***            | .05              | -.16***       | -.19***                    | .31***             | -.16***                  |
| SOC              | -.15***            | -.07*            | -.23***       | -.25***                    | .42***             | -.15***                  |
| OPT              | -.25***            | -.09***          | -.29***       | -.28***                    | .47***             | -.25***                  |
| SCON             | -.06*              | .01              | -.22***       | -.16*                      | .46***             | -.06*                    |
| PSUP             | -.19***            | -.08**           | -.20***       | -.23***                    | .37***             | -.19***                  |
| AUP              | -.14***            | -.03             | -.20***       | -.19**                     | .40***             | -.14***                  |
| IPG              | -.14***            | -.03             | -.17***       | -.49***                    | .49***             | -.14***                  |
| EDUI             | -.27***            | -.11***          | -.24**        | -.47***                    | .51***             | -.27***                  |
| total            | -.20***            | -.05             | -.29***       | -.36***                    | .58***             | -.20***                  |
| McDonald's Omega | .81                | .70              | .64           | .53                        | .79                | .86                      |

Note: \*  $p < .05$ . \*\*  $p < .01$ . \*\*\*  $p < .001$ . EPT = empathy and perspective-taking. SEFF = self-efficacy. SEST = self-esteem. SOC = sense of coherence. OPT = optimism. SCON = self-control. PSUP = parental social and emotional support. AUP = authoritative parenting. IPG = integration into peer groups. EDUI = educational integration.
